# Supplementary material for: PKR and TLR3 trigger distinct signals that coordinate the induction of antiviral apoptosis
Source: PubMed Central journal article supplement (PMC9378677; doi:10.1038/s41419-022-05101-3), 2022-08-15
Supplement: 41419_2022_5101_MOESM9_ESM.pdf [file 41419_2022_5101_MOESM9_ESM.pdf]

# Original western blots 1

Figure 6a

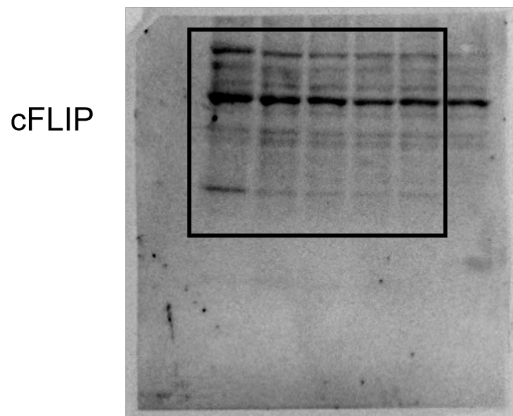

Figure 6b

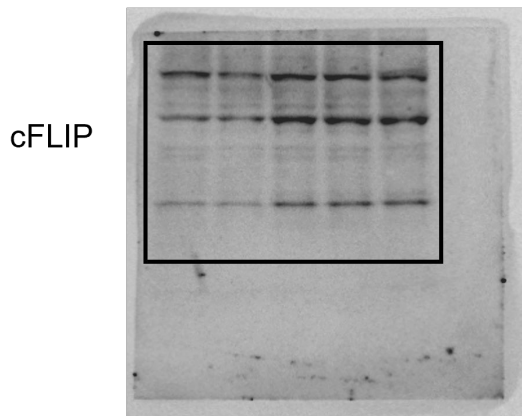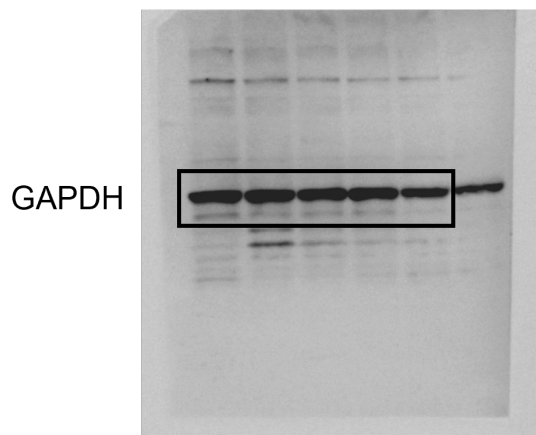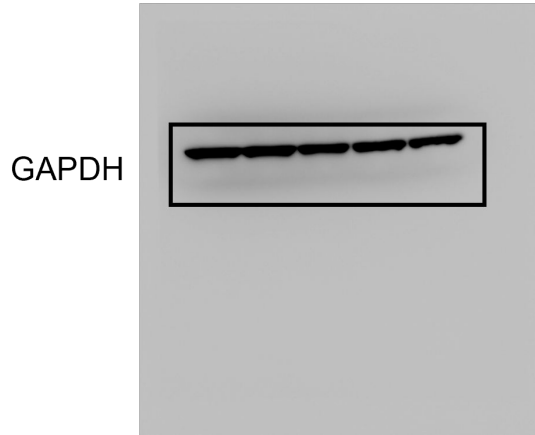

# Original western blots 2

Figure 6d

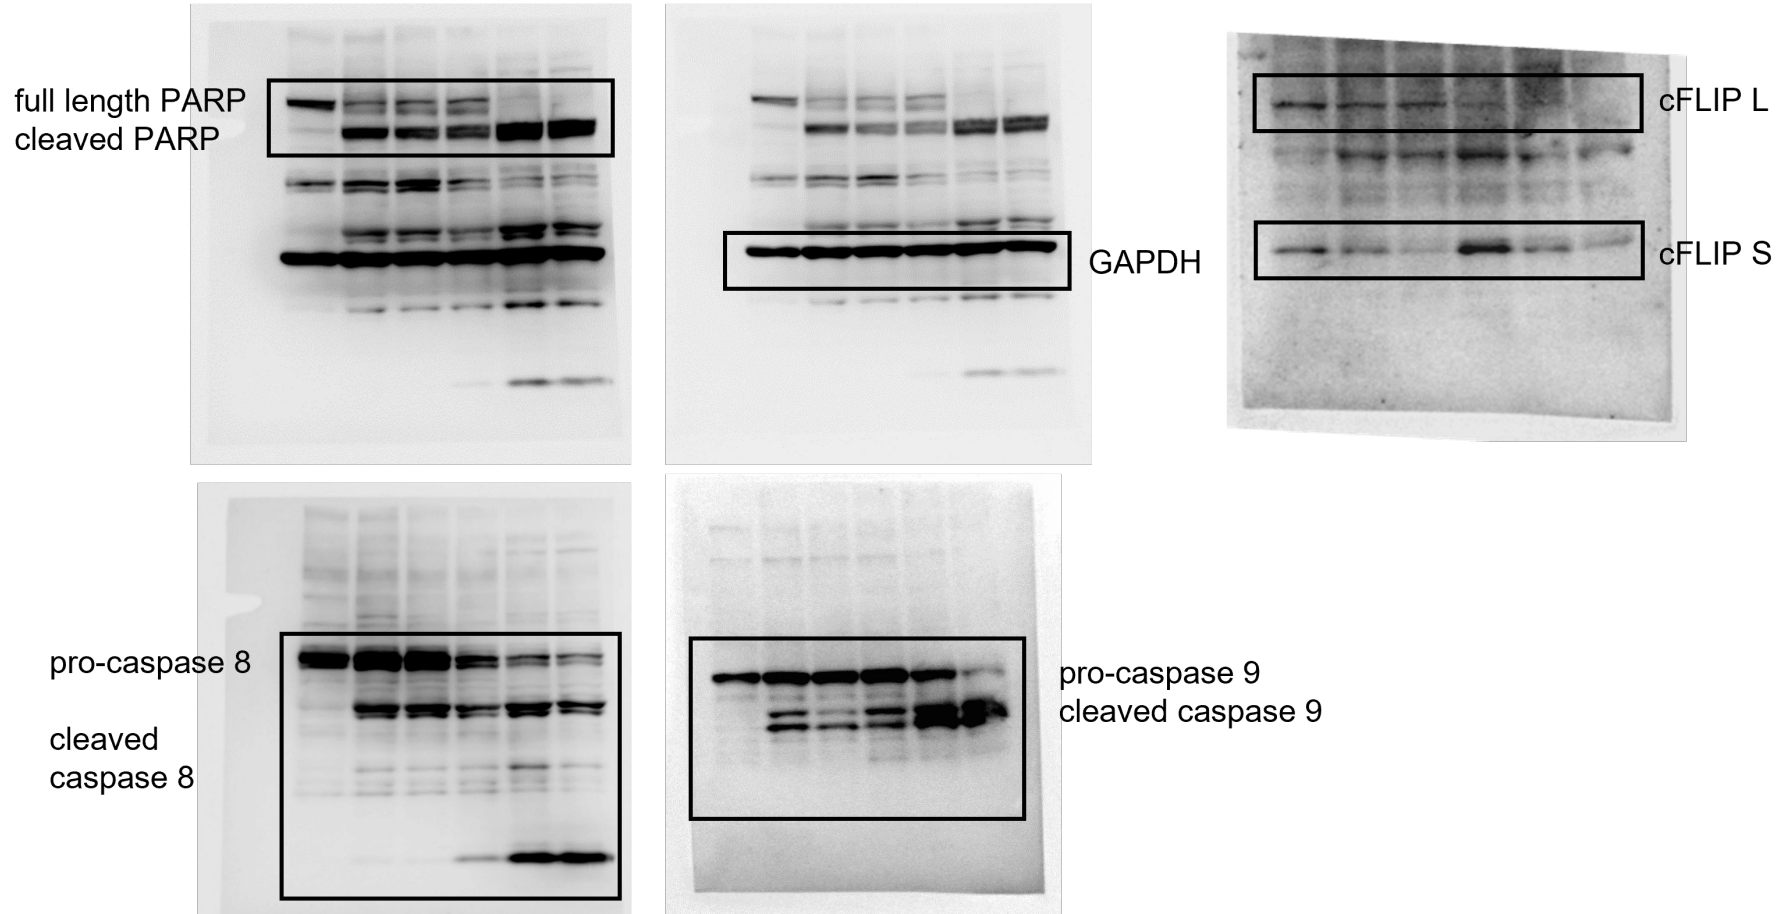

# Original western blots 3

Figure 6g

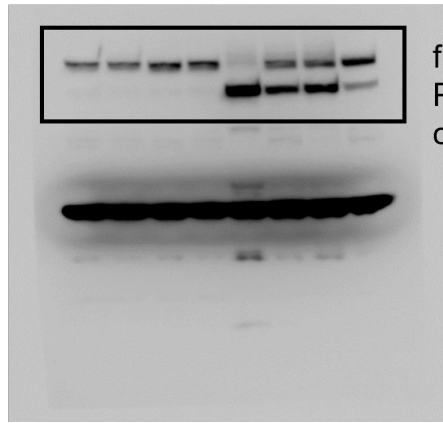

full length  
PARP  
cleaved PARP

GAPDH

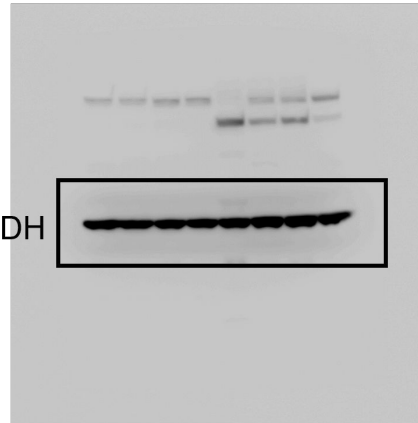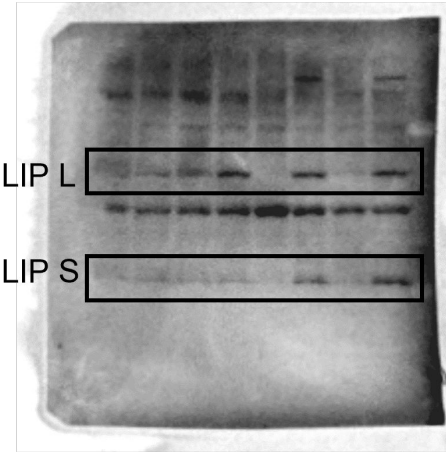

cFLIP L

cFLIP S

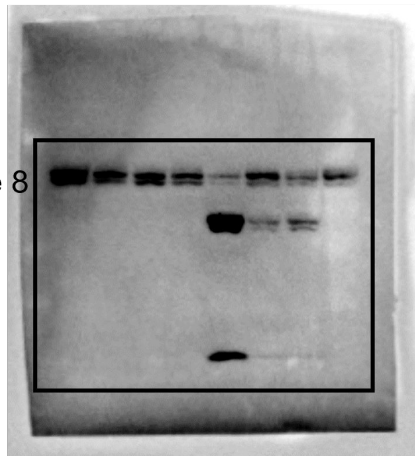

pro-caspase 8

cleaved  
caspase 8

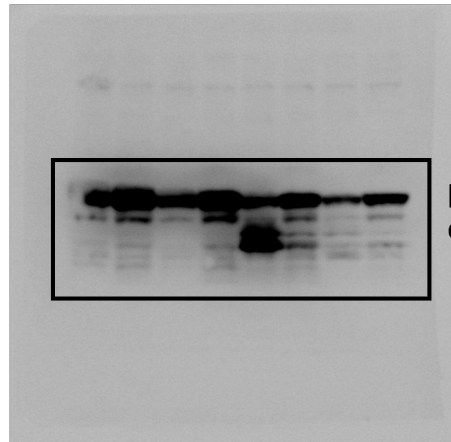

pro-caspase 9

cleaved caspase 9
